# Supplementary material for: Magnetism behaviours dominated by the interplay of magnetic anisotropy and exchange coupling in local CoII7 discs
Source: Royal Society of Chemistry journal article supplement (doi:10.1039/c6dt00010j), 2016-01-01
Supplement: c6dt00010j1.pdf [file c6dt00010j1.pdf]

## Supporting Information

### Magnetic behaviours dominated by the interplay of magnetic anisotropy and exchange coupling in the local Co<sup>II</sup><sub>7</sub> discs

En-Cui Yang,<sup>\*,a</sup> Zhong-Yi Liu,<sup>a</sup> Lei Zhang,<sup>a</sup> Na Yang,<sup>a</sup> Xiao-Jun Zhao<sup>\*,a,b</sup>

**Table S1.** Selected bond distances (Å) and angles (°) for **1**<sup>a</sup>

|                           |           |                           |            |
|---------------------------|-----------|---------------------------|------------|
| Co(1)–O(9)                | 1.998(3)  | Co(1)–O(13)               | 2.101(3)   |
| Co(1)–O(22)               | 2.004(3)  | Co(1)–O(6)                | 2.176(3)   |
| Co(1)–N(6)                | 2.042(3)  | Co(1)–O(26)               | 2.285(4)   |
| Co(2)–O(3)                | 2.006(3)  | Co(2)–O(17)               | 2.094(3)   |
| Co(2)–O(21)               | 2.038(3)  | Co(2)–O(25)               | 2.171(3)   |
| Co(2)–N(7)                | 2.077(3)  | Co(2)–O(6)                | 2.208(3)   |
| Co(3)–O(14)               | 2.073(3)  | Co(3)–O(22)               | 2.105(3)   |
| Co(3)–O(24)               | 2.099(3)  | Co(3)–O(30) <sup>#1</sup> | 2.122(3)   |
| Co(3)–O(15) <sup>#2</sup> | 2.101(2)  | Co(3)–O(10)               | 2.170(3)   |
| Co(4)–O(23)               | 1.961(3)  | Co(4)–O(20) <sup>#3</sup> | 2.075(3)   |
| Co(4)–O(11) <sup>#1</sup> | 1.980(3)  | Co(4)–O(7) <sup>#1</sup>  | 2.183(3)   |
| Co(4)–N(1)                | 2.016(3)  | Co(5)–O(5)                | 2.086(3)   |
| Co(5)–O(22)               | 2.061(3)  | Co(5)–O(24)               | 2.105(3)   |
| Co(5)–O(23)               | 2.070(3)  | Co(5)–O(8) <sup>#1</sup>  | 2.114(3)   |
| Co(5)–O(21)               | 2.081(3)  | Co(6)–O(16) <sup>#2</sup> | 2.070(3)   |
| Co(6)–O(24)               | 1.968(3)  | Co(6)–O(7) <sup>#1</sup>  | 2.165(3)   |
| Co(6)–O(31) <sup>#1</sup> | 1.997(3)  | Co(6)–N(2)                | 2.028(3)   |
| Co(7)–O(18)               | 2.072(2)  | Co(7)–O(4)                | 2.117(3)   |
| Co(7)–O(21)               | 2.082(3)  | Co(7)–O(23)               | 2.129(3)   |
| Co(7)–O(19) <sup>#3</sup> | 2.104(3)  | Co(7)–O(12) <sup>#1</sup> | 2.181(3)   |
| O(9)–Co(1)–O(22)          | 99.00(11) | O(9)–Co(1)–O(13)          | 90.49(11)  |
| O(9)–Co(1)–O(6)           | 83.65(11) | O(22)–Co(1)–O(13)         | 90.01(11)  |
| O(9)–Co(1)–O(2)           | 81.10(14) | O(22)–Co(1)–N(6)          | 101.01(12) |
| N(6)–Co(1)–O(6)           | 89.40(11) | O(22)–Co(1)–O(6)          | 96.17(10)  |
| N(6)–Co(1)–O(13)          | 94.31(11) | O(13)–Co(1)–O(2)          | 83.19(14)  |
| N(6)–Co(1)–O(2)           | 79.60(15) | O(6)–Co(1)–O(2)           | 90.60(14)  |
| O(3)–Co(2)–O(21)          | 96.84(11) | O(21)–Co(2)–N(7)          | 96.59(11)  |
| O(3)–Co(2)–O(17)          | 90.09(11) | O(21)–Co(2)–O(17)         | 90.68(10)  |
| N(7)–Co(2)–O(17)          | 93.14(11) | N(7)–Co(2)–O(25)          | 84.13(12)  |
| O(3)–Co(2)–O(25)          | 82.60(12) | O(17)–Co(2)–O(25)         | 86.88(12)  |
| O(21)–Co(2)–O(6)          | 91.28(10) | O(3)–Co(2)–O(6)           | 87.15(11)  |
| O(25)–Co(2)–O(6)          | 91.14(11) | N(7)–Co(2)–O(6)           | 89.16(11)  |

|                                                |            |                                                |            |
|------------------------------------------------|------------|------------------------------------------------|------------|
| O(24)–Co(3)–O(22)                              | 79.15(10)  | O(24)–Co(3)–O(15) <sup>#2</sup>                | 94.35(10)  |
| O(14)–Co(3)–O(15) <sup>#2</sup>                | 92.62(10)  | O(14)–Co(3)–O(22)                              | 94.19(10)  |
| O(14)–Co(3)–O(30) <sup>#1</sup>                | 85.79(11)  | O(24)–Co(3)–O(30) <sup>#1</sup>                | 97.80(11)  |
| O(15) <sup>#2</sup> –Co(3)–O(30) <sup>#1</sup> | 86.71(11)  | O(24)–Co(3)–O(10)                              | 93.31(11)  |
| O(22)–Co(3)–O(30) <sup>#1</sup>                | 89.11(11)  | O(15) <sup>#2</sup> –Co(3)–O(10)               | 82.42(10)  |
| O(22)–Co(3)–O(10)                              | 102.90(10) | O(14)–Co(3)–O(10)                              | 84.42(11)  |
| O(23)–Co(4)–O(7) <sup>#1</sup>                 | 95.96(11)  | O(23)–Co(4)–O(11) <sup>#1</sup>                | 106.86(11) |
| O(23)–Co(4)–N(1)                               | 114.84(12) | O(23)–Co(4)–O(20) <sup>#3</sup>                | 95.87(11)  |
| N(1)–Co(4)–O(7) <sup>#1</sup>                  | 84.24(11)  | N(1)–Co(4)–O(20) <sup>#3</sup>                 | 94.37(11)  |
| O(11) <sup>#1</sup> –Co(4)–N(1)                | 137.47(12) | O(11) <sup>#1</sup> –Co(4)–O(7) <sup>#1</sup>  | 83.54(11)  |
| O(11) <sup>#1</sup> –Co(4)–O(20) <sup>#3</sup> | 89.23(12)  | O(21)–Co(5)–O(8) <sup>#1</sup>                 | 86.02(10)  |
| O(22)–Co(5)–O(21)                              | 101.90(10) | O(21)–Co(5)–O(5)                               | 93.34(11)  |
| O(22)–Co(5)–O(24)                              | 80.02(10)  | O(23)–Co(5)–O(24)                              | 97.17(10)  |
| O(22)–Co(5)–O(5)                               | 92.72(11)  | O(23)–Co(5)–O(8) <sup>#1</sup>                 | 93.13(11)  |
| O(22)–Co(5)–O(8) <sup>#1</sup>                 | 87.01(11)  | O(23)–Co(5)–O(21)                              | 80.91(10)  |
| O(5)–Co(5)–O(24)                               | 85.77(11)  | O(24)–Co(6)–O(31) <sup>#1</sup>                | 110.57(11) |
| O(24)–Co(5)–O(8) <sup>#1</sup>                 | 94.89(11)  | O(24)–Co(6)–O(16) <sup>#2</sup>                | 94.06(11)  |
| O(24)–Co(6)–N(2)                               | 112.40(12) | O(31) <sup>#1</sup> –Co(6)–O(16) <sup>#2</sup> | 88.76(11)  |
| O(31) <sup>#1</sup> –Co(6)–N(2)                | 136.70(12) | N(2)–Co(6)–O(16) <sup>#2</sup>                 | 93.30(11)  |
| O(24)–Co(6)–O(7) <sup>#1</sup>                 | 93.17(11)  | O(31) <sup>#1</sup> –Co(6)–O(7) <sup>#1</sup>  | 87.85(11)  |
| N(2)–Co(6)–O(7) <sup>#1</sup>                  | 84.78(11)  | O(19) <sup>#3</sup> –Co(7)–O(4)                | 84.11(11)  |
| O(18)–Co(7)–O(19) <sup>#3</sup>                | 93.37(10)  | O(21)–Co(7)–O(23)                              | 79.52(10)  |
| O(18)–Co(7)–O(4)                               | 88.94(10)  | O(19) <sup>#3</sup> –Co(7)–O(23)               | 92.83(10)  |
| O(21)–Co(7)–O(4)                               | 102.37(11) | O(18)–Co(7)–O(21)                              | 94.76(10)  |
| O(4)–Co(7)–O(23)                               | 87.94(10)  | O(23)–Co(7)–O(12) <sup>#1</sup>                | 100.64(10) |
| O(18)–Co(7)–O(12) <sup>#1</sup>                | 84.00(10)  | O(19) <sup>#3</sup> –Co(7)–O(12) <sup>#1</sup> | 81.75(10)  |
| O(21)–Co(7)–O(12) <sup>#1</sup>                | 92.78(10)  |                                                |            |

<sup>a</sup> Symmetry codes: <sup>#1</sup> 1 – x, y – 1/2, 1/2 – z; <sup>#2</sup> – x, –y, –z; <sup>#3</sup> 2 – x, –y, 1 – z.

**Table S2.** Hydrogen-bonding parameters (Å, deg) for **1** and **2**<sup>a</sup>

| D–H···A                       | <i>d</i> (D–H) | <i>d</i> (H···A) | <i>d</i> (D..A) | ∠DHA  |
|-------------------------------|----------------|------------------|-----------------|-------|
| <b>1</b>                      |                |                  |                 |       |
| N10–H10B···O29A <sup>#1</sup> | 0.86           | 2.06             | 2.898(8)        | 165.2 |
| N5–H5B···O28                  | 0.86           | 2.14             | 2.949(6)        | 158.1 |
| O21–H21···N9 <sup>#2</sup>    | 0.82           | 2.46             | 3.275(1)        | 178.0 |
| O24–H24A···N4 <sup>#1</sup>   | 0.82           | 2.36             | 3.178(2)        | 174.0 |
| <b>2</b>                      |                |                  |                 |       |
| O7W–H7WA···O4 <sup>#1</sup>   | 0.84           | 2.26             | 2.889(17)       | 131.8 |
| O7W–H7WB···N1 <sup>#2</sup>   | 0.84           | 1.74             | 2.57(3)         | 166.8 |
| O7W–H7WB···N7 <sup>#3</sup>   | 0.84           | 1.92             | 2.73(14)        | 161.3 |

<sup>a</sup> Symmetry codes: for **1** <sup>#1</sup>  $x-1, 1/2-y, z-1/2$ ; <sup>#2</sup>  $1-x, -y, 1-z$ . For **2**: <sup>#1</sup>  $2-x, 1-y, 1-z$ ; <sup>#2</sup>  $x+1/2, y+$

$1/2, z+1/2$ ; <sup>#3</sup>  $x+1/2, 3/2-y, z+1/2$ .

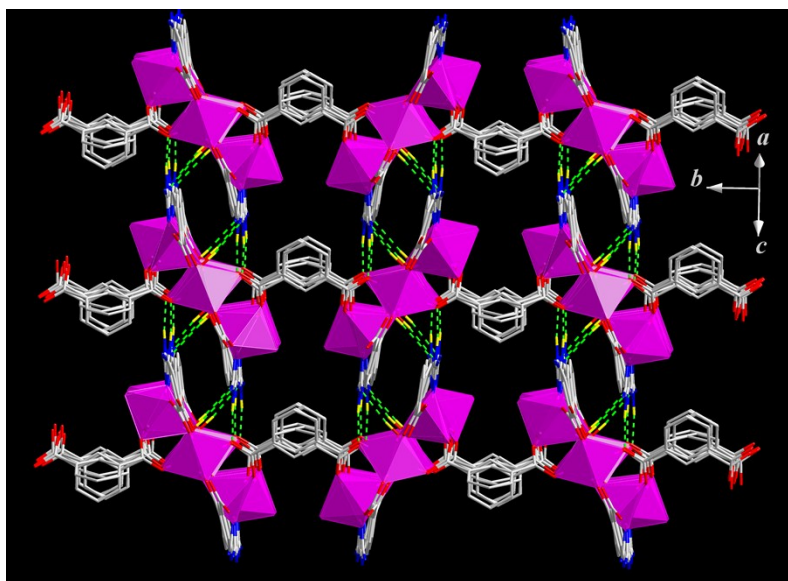

**Fig. S1** 3D supramolecular network of **1** formed by hydrogen-bonding interactions.

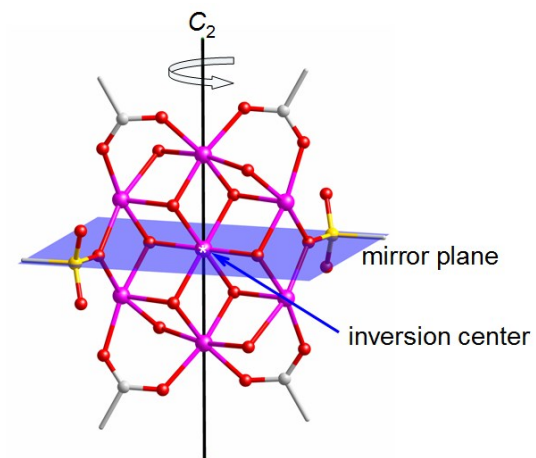

**Fig. S2** Crystallographic symmetry in the local Co<sup>II</sup><sub>7</sub> disc of **2**.

**Table S3.** Selected bond distance (Å) and angles (°) for **2**<sup>a</sup>

|                                              |           |                                              |           |
|----------------------------------------------|-----------|----------------------------------------------|-----------|
| Co(1)–O(5)                                   | 2.097(11) | Co(3)–O(5) <sup>#3</sup>                     | 2.061(10) |
| Co(1)–O(6)                                   | 2.105(13) | Co(3)–O(2) <sup>#6</sup>                     | 2.067(11) |
| Co(2)–O(5)                                   | 2.018(11) | Co(3)–N(3)                                   | 2.17(2)   |
| Co(2)–O(1) <sup>#4</sup>                     | 2.086(12) | Co(3)–O(3)                                   | 2.209(12) |
| Co(2)–O(7)                                   | 2.227(11) | Co(3)–O(7) <sup>#3</sup>                     | 2.301(11) |
| Co(3)–O(6)                                   | 2.044(9)  | N(9)–Co(3) <sup>#1</sup>                     | 1.976(13) |
| O(5) <sup>#1</sup> –Co(1)–O(5) <sup>#2</sup> | 180.0(4)  | O(6)–Co(3)–O(5) <sup>#3</sup>                | 83.3(5)   |
| O(5) <sup>#1</sup> –Co(1)–O(5)               | 100.9(6)  | O(6)–Co(3)–O(2) <sup>#6</sup>                | 167.8(5)  |
| O(5) <sup>#2</sup> –Co(1)–O(5)               | 79.1(6)   | O(5) <sup>#3</sup> –Co(3)–O(2) <sup>#6</sup> | 91.1(5)   |
| O(5) <sup>#2</sup> –Co(1)–O(6)               | 80.9(4)   | O(6)–Co(3)–N(3)                              | 88.8(9)   |
| O(5)–Co(1)–O(6)                              | 99.1(4)   | O(5) <sup>#3</sup> –Co(3)–N(3)               | 166.7(8)  |
| O(6)–Co(1)–O(6) <sup>#3</sup>                | 180.0     | O(2) <sup>#6</sup> –Co(3)–N(3)               | 98.6(8)   |
| O(5)–Co(2)–O(5) <sup>#2</sup>                | 82.9(6)   | O(6)–Co(3)–O(3)                              | 81.3(5)   |
| O(5)–Co(2)–O(1) <sup>#4</sup>                | 168.9(4)  | O(5) <sup>#3</sup> –Co(3)–O(3)               | 86.4(5)   |
| O(5) <sup>#2</sup> –Co(2)–O(1) <sup>#4</sup> | 91.1(5)   | O(2) <sup>#6</sup> –Co(3)–O(3)               | 109.2(5)  |
| O(1) <sup>#4</sup> –Co(2)–O(1) <sup>#5</sup> | 96.2(7)   | N(3)–Co(3)–O(3)                              | 81.8(10)  |
| O(1) <sup>#4</sup> –Co(2)–O(7) <sup>#2</sup> | 85.2(5)   | O(6)–Co(3)–O(7) <sup>#3</sup>                | 87.0(5)   |
| O(5)–Co(2)–O(7)                              | 87.3(4)   | O(5) <sup>#3</sup> –Co(3)–O(7) <sup>#3</sup> | 84.3(4)   |
| O(5) <sup>#2</sup> –Co(2)–O(7)               | 85.2(4)   | O(2) <sup>#6</sup> –Co(3)–O(7) <sup>#3</sup> | 81.7(4)   |
| O(1) <sup>#4</sup> –Co(2)–O(7)               | 101.6(4)  | N(3)–Co(3)–O(7) <sup>#3</sup>                | 106.0(10) |
| O(7) <sup>#2</sup> –Co(2)–O(7)               | 170.0(6)  | O(3)–Co(3)–O(7) <sup>#3</sup>                | 165.9(4)  |

<sup>a</sup> Symmetry codes: <sup>#1</sup>  $x, 1 - y, z$ ; <sup>#2</sup>  $1 - x, y, 1 - z$ ; <sup>#3</sup>  $1 - x, 1 - y, 1 - z$ ; <sup>#4</sup>  $3/2 - x, y + 1/2, 1/2 - z$ ; <sup>#5</sup>  $x - 1/2, y + 1/2, z + 1/2$ ; <sup>#6</sup>  $3/2 - x, 1/2 - y, 1/2 - z$ .

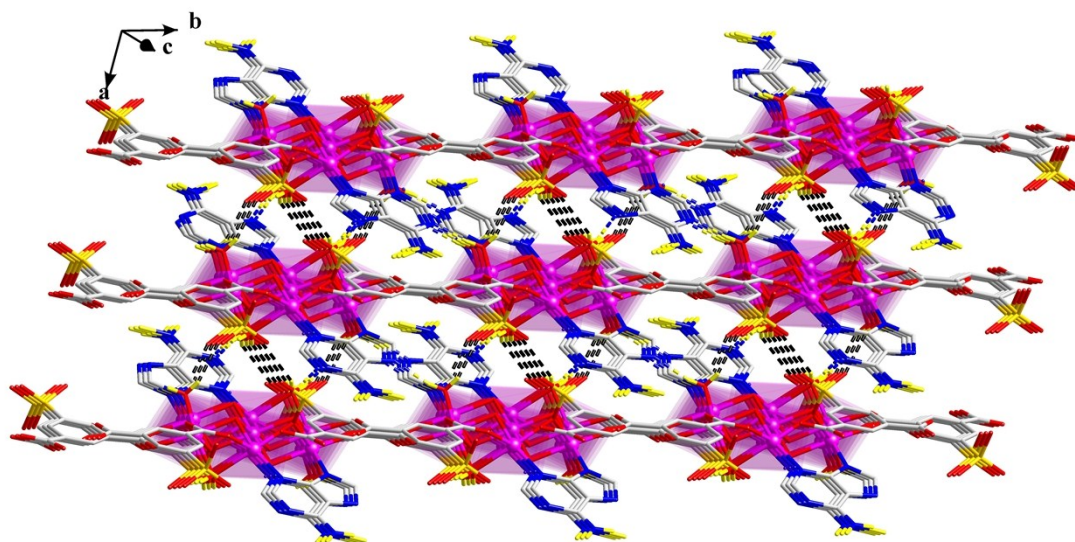

Fig. S3 3D supramolecular network of 2 generated by hydrogen-bonding interactions.

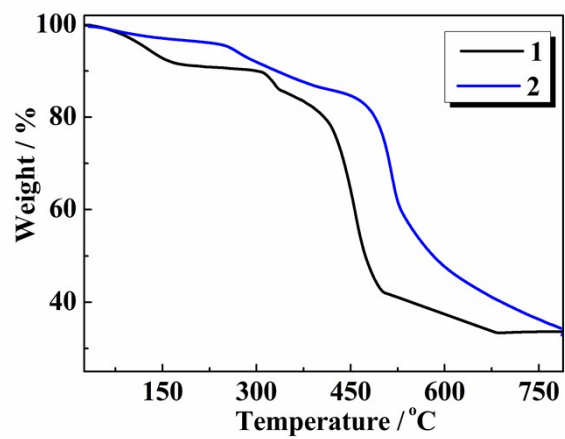

**Fig. S4** TG curves for 1 and 2.



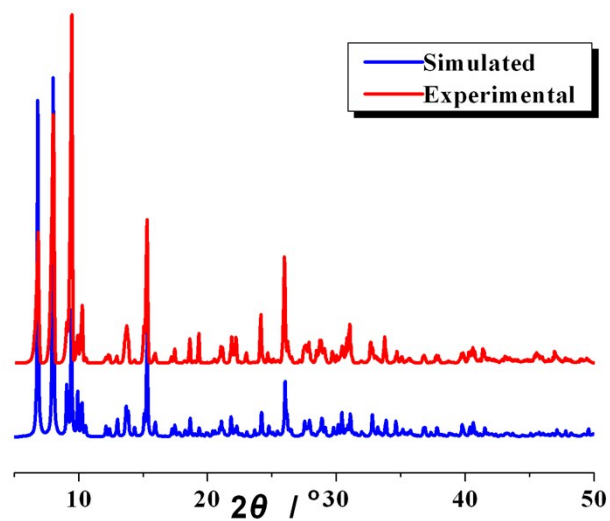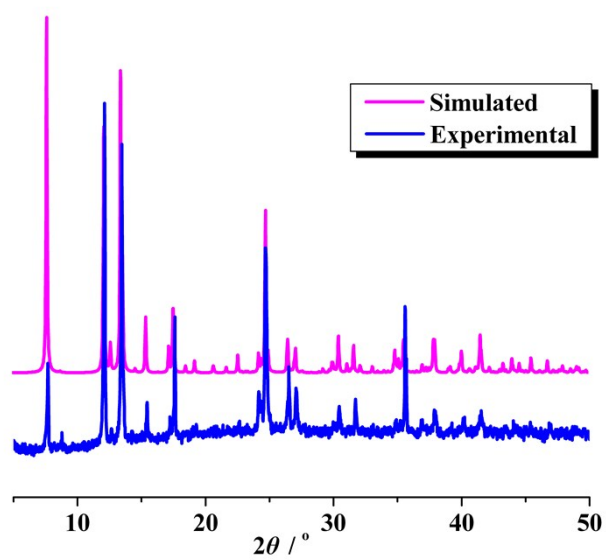

**Fig. S5** Simulated and experimental PXRd patterns for **1** (top) and **2** (bottom).

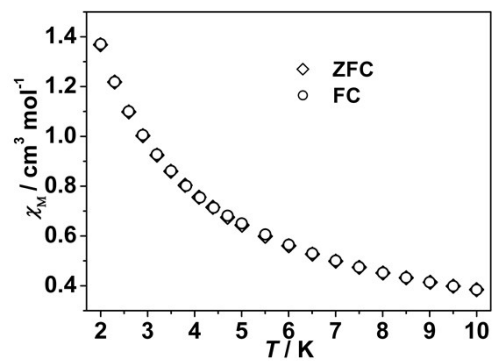

**Fig. S6** FC and ZFC magnetizations for **1** at 50.0 Oe dc field.

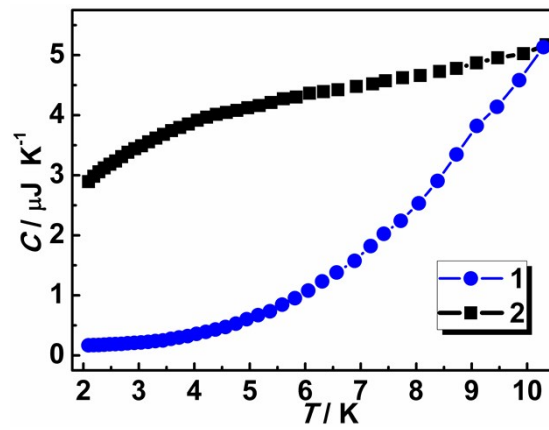

**Fig. S7** Temperature-dependent heat capacity for **1** and **2** measured at zero dc field.

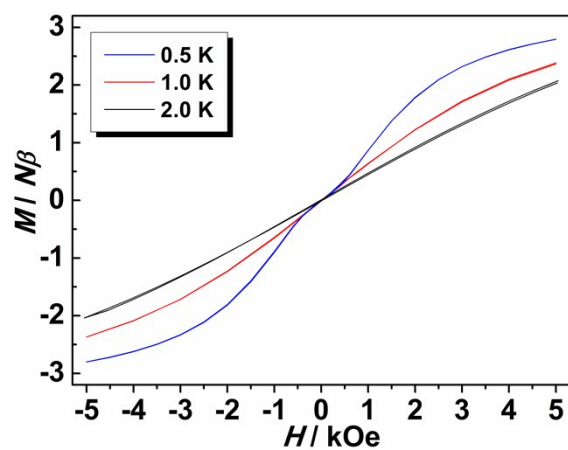

**Fig. S8** Magnetization ( $M$ ) vs. applied dc field ( $H$ ) hysteresis loops for **1** at the indicated temperatures.

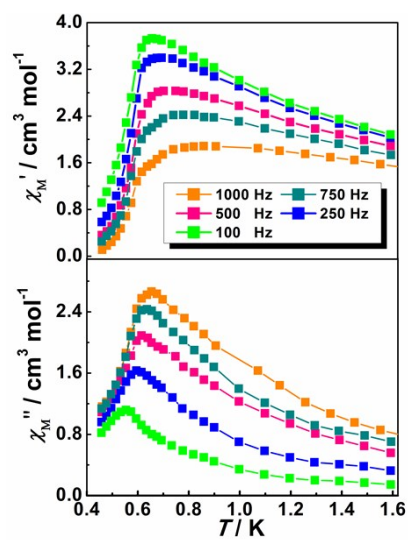

**Fig. S9** Temperature dependence of real ( $\chi'$ ) and imaginary ( $\chi''$ ) components of the ac susceptibility of **1** in zero dc field with an oscillating field of 3.5 Oe over frequencies of 100–1500 Hz.

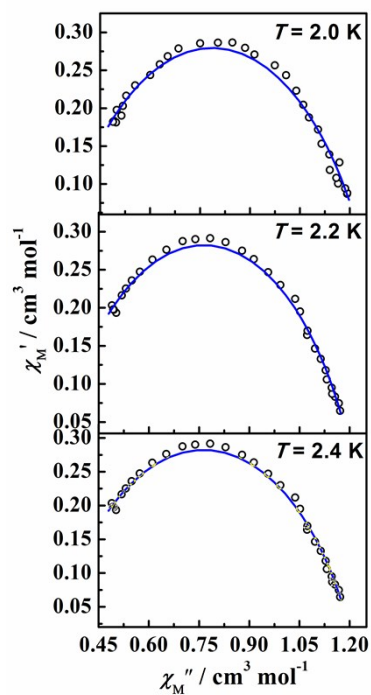

**Fig. S10** Cole–Cole plots of **1** at different temperatures.

**Table S4.** Parameters obtained by fitting the ac magnetic susceptibilities between 2.0 and 2.4 K with generalized Debye-model for **1**.

| $T / \text{K}$ | $\chi_0 / \text{cm}^3 \text{mol}^{-1}$ | $\chi_\infty / \text{cm}^3 \text{mol}^{-1}$ | $\tau \text{ (s)}$ | $\alpha$ | $R$                  |
|----------------|----------------------------------------|---------------------------------------------|--------------------|----------|----------------------|
| 2.0 K          | 1.24                                   | 0.32                                        | $6 \times 10^{-4}$ | 0.31     | $5.5 \times 10^{-3}$ |
| 2.2 K          | 1.21                                   | 0.32                                        | $5 \times 10^{-4}$ | 0.28     | $5.8 \times 10^{-3}$ |
| 2.4 K          | 1.17                                   | 0.28                                        | $3 \times 10^{-4}$ | 0.25     | $2.1 \times 10^{-3}$ |

$$R = \frac{\sum[(\chi'_{\text{obs}} - \chi'_{\text{cal}})^2 + (\chi''_{\text{obs}} - \chi''_{\text{cal}})^2]}{\sum(\chi'_{\text{obs}}{}^2 + \chi''_{\text{obs}}{}^2)}$$

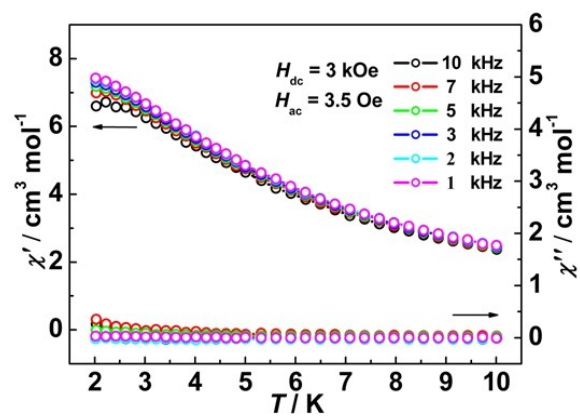

**Fig. S11** Temperature dependence of real ( $\chi'$ ) and imaginary ( $\chi''$ ) components of the ac susceptibility for **2** under  $H_{dc} = 3000$  and  $H_{ac} = 3.5$  Oe over the frequencies of 1–10 kHz.
